# Supplementary material
Source: HighWire-hosted journal article supplement (https://www.annfammed.org/highwire/filestream/8844/field_highwire_adjunct_files/0/Ebell_Supp_Apps.pdf)

## Supplemental materials for:

Ebell MH, Hansen J. Proposed clinical decision rules to diagnose acute rhinosinusitis among adults in primary care. *Ann Fam Med*. 2017;15(4):347-354.

## Appendix 1. Hosmer-Lemeshow Calibration Plots

Figures 1. Hosmer-Lemeshow calibration plot for clinical decision rule using abnormal bacterial culture as the reference standard.

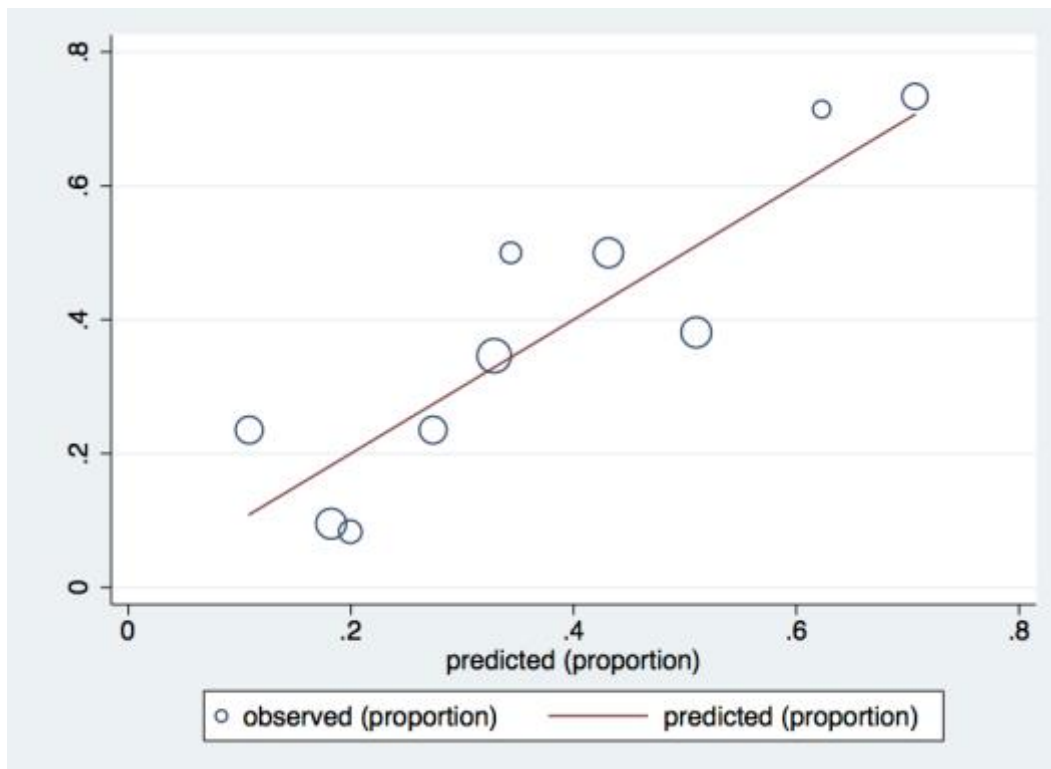

Figure 2. Hosmer-Lemeshow calibration plot for clinical decision rule using abnormal computed tomogram as the reference standard.

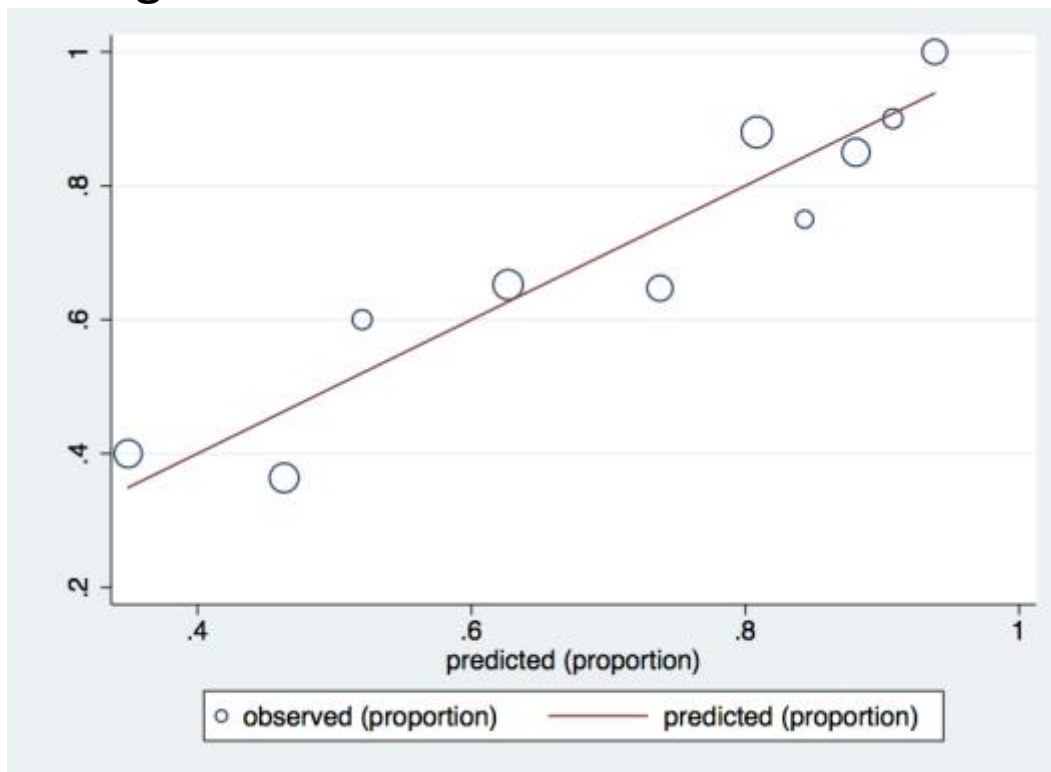

Figure 2. Hosmer-Lemeshow calibration plot for clinical decision rule using abnormal antral puncture fluid as the reference standard.

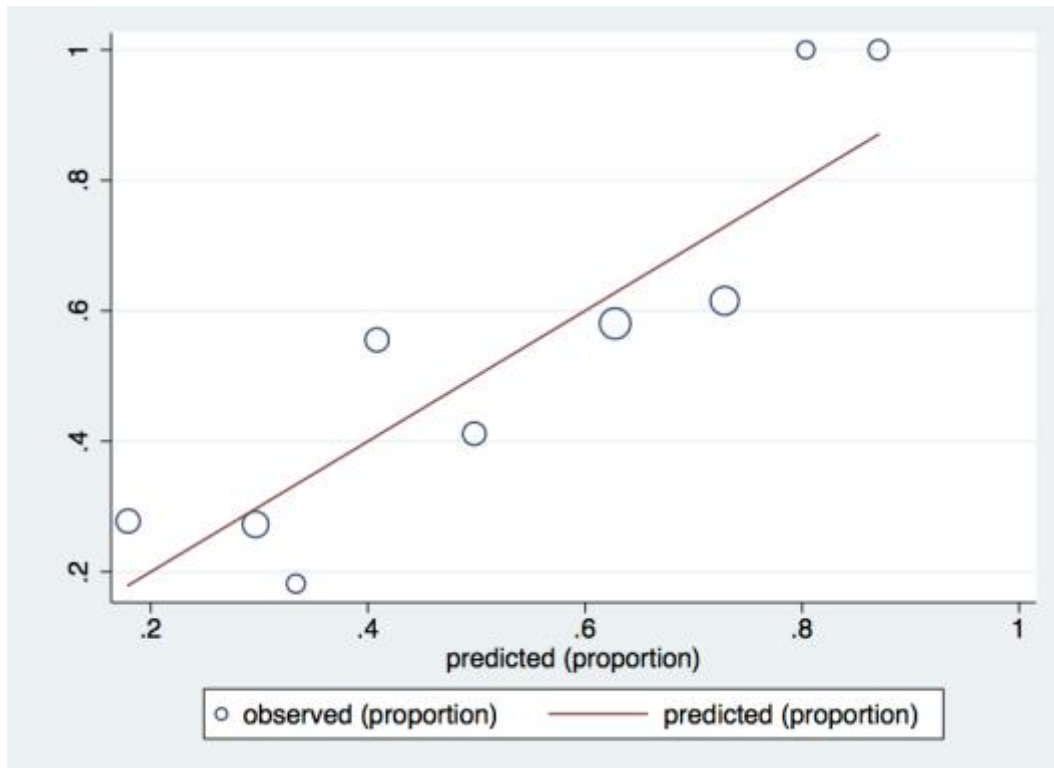

# Appendix 2. Additional Classification and Regression Tree models

Figure 1. Classification and Regression Tree model using abnormal computed tomography as the reference standard.

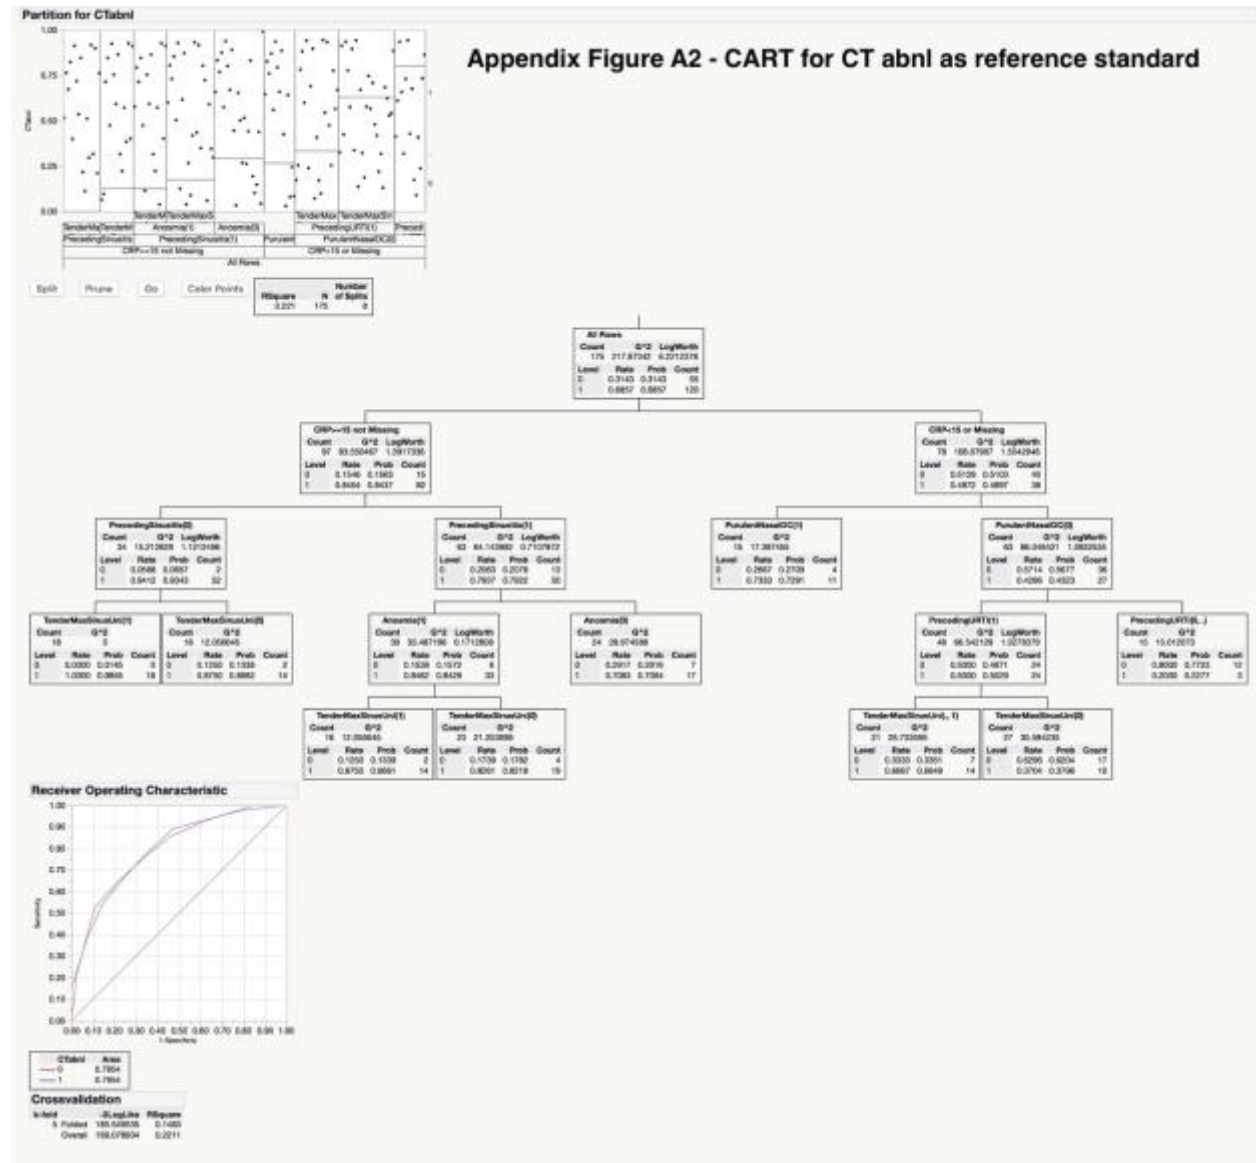

Figure 2. Classification and Regression Tree model using abnormal antral puncture fluid as the reference standard.

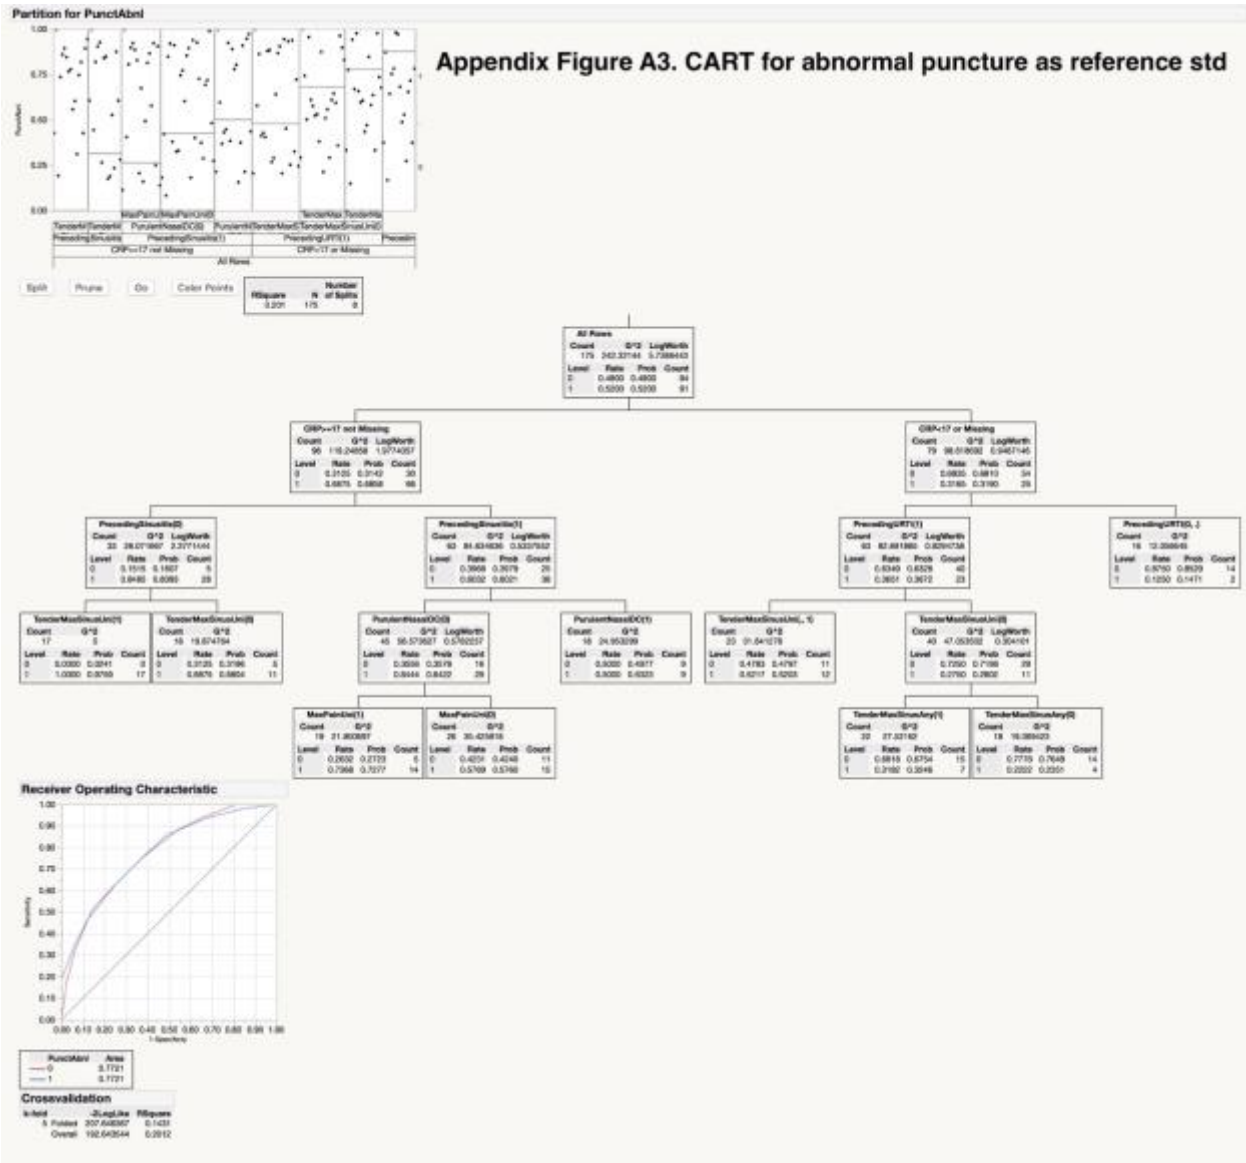

Supplement: Ebell_Supp_Apps.pdf [file Ebell_Supp_Apps.pdf]
